# Supplementary material for: A specific microRNA profile as predictive biomarker for systemic treatment in patients with metastatic colorectal cancer
Source: PubMed Central journal article supplement (PMC7571833; doi:10.1002/cam4.3371), 2020-08-30

**A**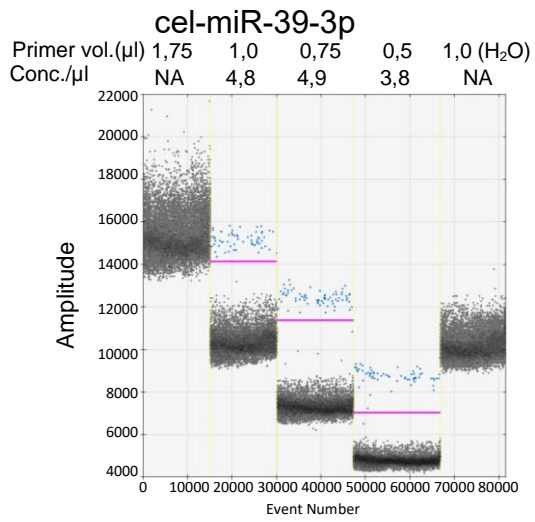**B**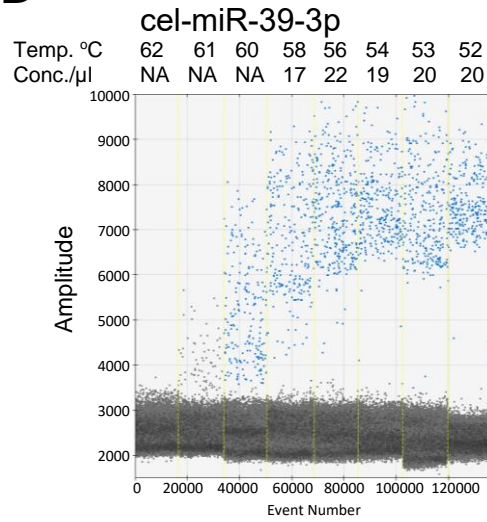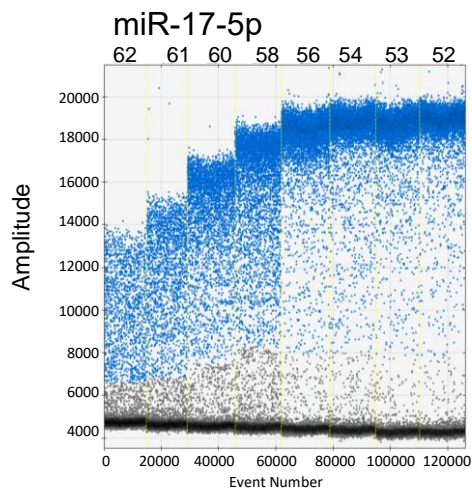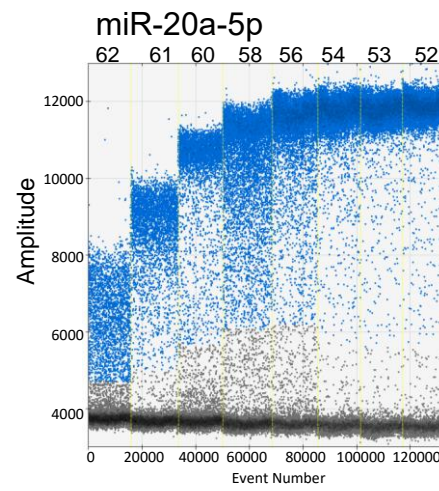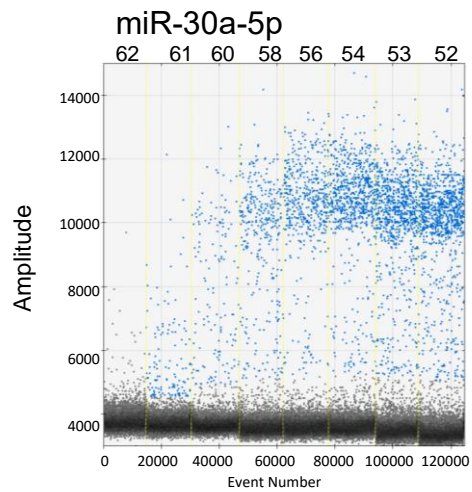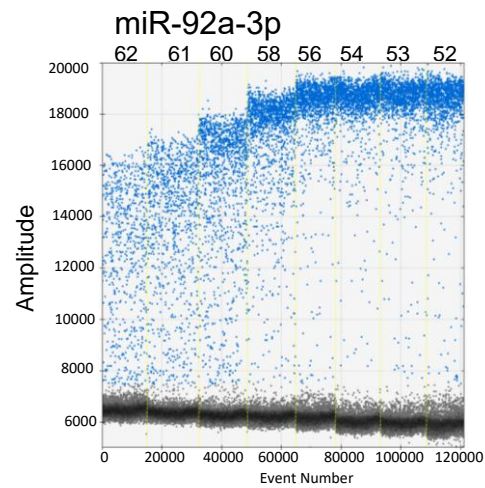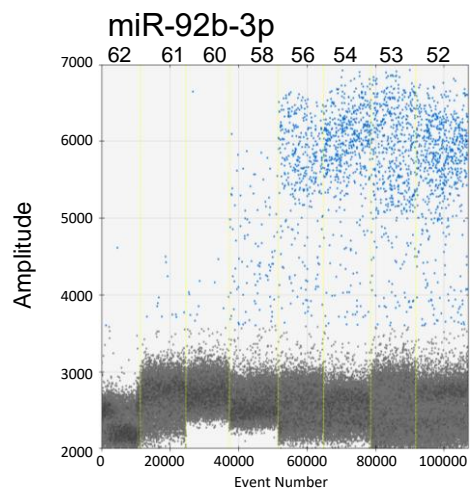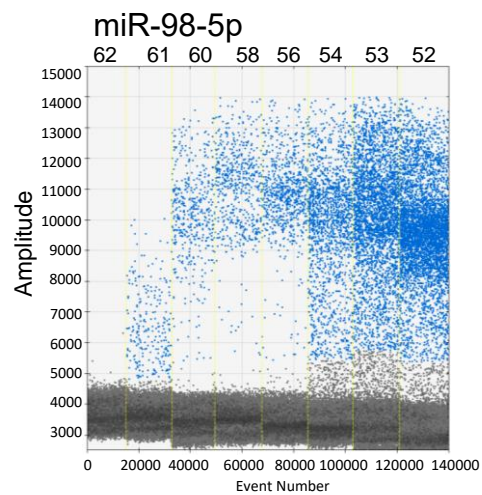

Supplement: CAM4-9-7558-s001.pdf [file CAM4-9-7558-s001.pdf]
